# Supplementary material for: A triple bond side-chained 2D-conjugated benzodithiophene based photovoltaic polymer
Source: Royal Society of Chemistry journal article supplement (doi:10.1039/c4ra10154e), 2014-01-01
Supplement: c4ra10154e1.pdf [file c4ra10154e1.pdf]

## Supporting Information

### Triple Bond Side-Chained 2D-Conjugated Benzodithiophene based Photovoltaic Polymer

Shuguang Wen <sup>b§</sup>, Xiao Yun <sup>a,b§</sup>, Weichao Chen <sup>b</sup>, Qian Liu <sup>a,b</sup>, Dangqiang Zhu <sup>b</sup>,  
Chuantao Gu <sup>b</sup>, Mingliang Sun <sup>a\*</sup>, Renqiang Yang <sup>b\*</sup>

<sup>a</sup> Institute of Material Science and Engineering, Ocean University of China, Qingdao 266100, People's Republic of China. Fax: 86-532- 66781927; Tel: 86-532-66781690; E-mail: mlsun@ouc.edu.cn

<sup>b</sup> CAS Key Laboratory of Bio-based Materials, Qingdao Institute of Bioenergy and Bioprocess Technology, Chinese Academy of Sciences, Qingdao 266101, People's Republic of China. Fax: 86-532-80662778; Tel: 86-532-80662700; E-mail: yangrq@qibebt.ac.cn

### Table of Contents

**Fig. S1** <sup>1</sup>H NMR of 1-bromo-3,5-bis(octyloxy)phenyl (M2)

**Fig. S2** <sup>1</sup>H NMR of 1-(trimethylsilyl)ethynyl-3,5-bis(octyloxy)phenyl (M3)

**Fig. S3** <sup>1</sup>H NMR of 1-ethynyl-3,5-bis(octyloxy)phenyl (M4)

**Fig. S4** <sup>1</sup>H NMR of 4,8-bis(1-ethynyl-3,5-bis(octyloxy)phenyl)-benzo[1,2-b:4,5-b']dithiophene (M5)

**Fig. S5** <sup>1</sup>H NMR of 2,6-bis(trimethyltin-4,8-bis(1-ethynyl-3,5-bis(octyloxy)phenyl)-benzo[1,2-b:4,5-b']dithiophene (M6)

**Fig. S6** <sup>13</sup>C NMR of 2,6-bis(trimethyltin-4,8-bis(1-ethynyl-3,5-bis(octyloxy)phenyl)-benzo[1,2-b:4,5-b']dithiophene (M6)

**Fig. S7** <sup>1</sup>H NMR of PBDTPA-TPD

**Fig. S8** <sup>1</sup>H NMR of PBDTPA-TT

**Fig. S9** <sup>1</sup>H NMR of PBDTPA-DPP(OD)

**Fig. S10** *J-V* curves of OSCs based on PBDTPA-DPP(OD) and PC<sub>61</sub>BM with different blend ratios (1:1, 1:1.5, 1:2 and 1:3, w/w)

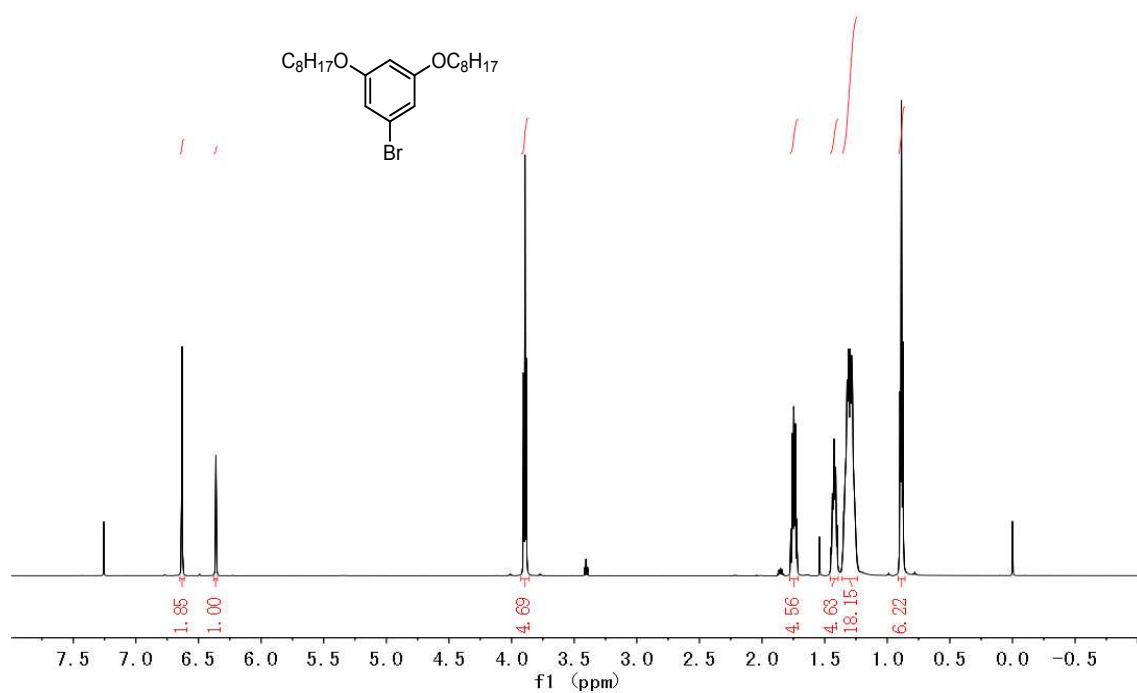

**Fig. S1** <sup>1</sup>H NMR of 1-bromo-3,5-bis(octyloxy)phenyl (M2)

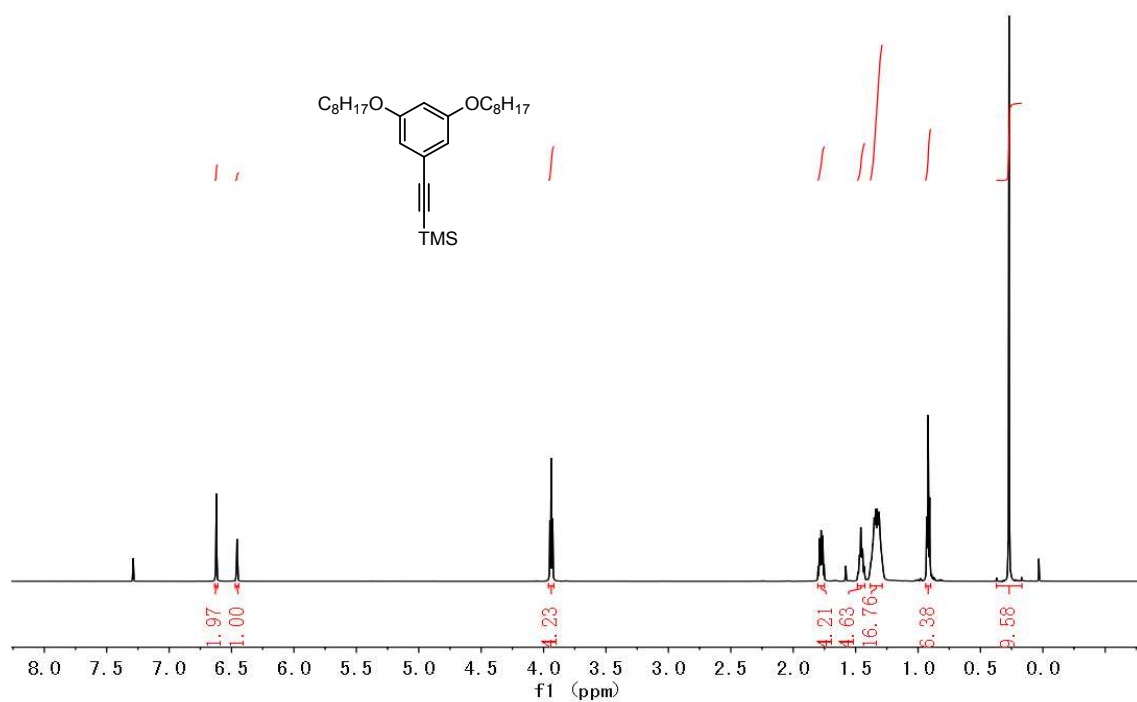

**Fig. S2** <sup>1</sup>H NMR of 1-(trimethylsilyl)ethynyl-3,5-bis(octyloxy)phenyl (M3)

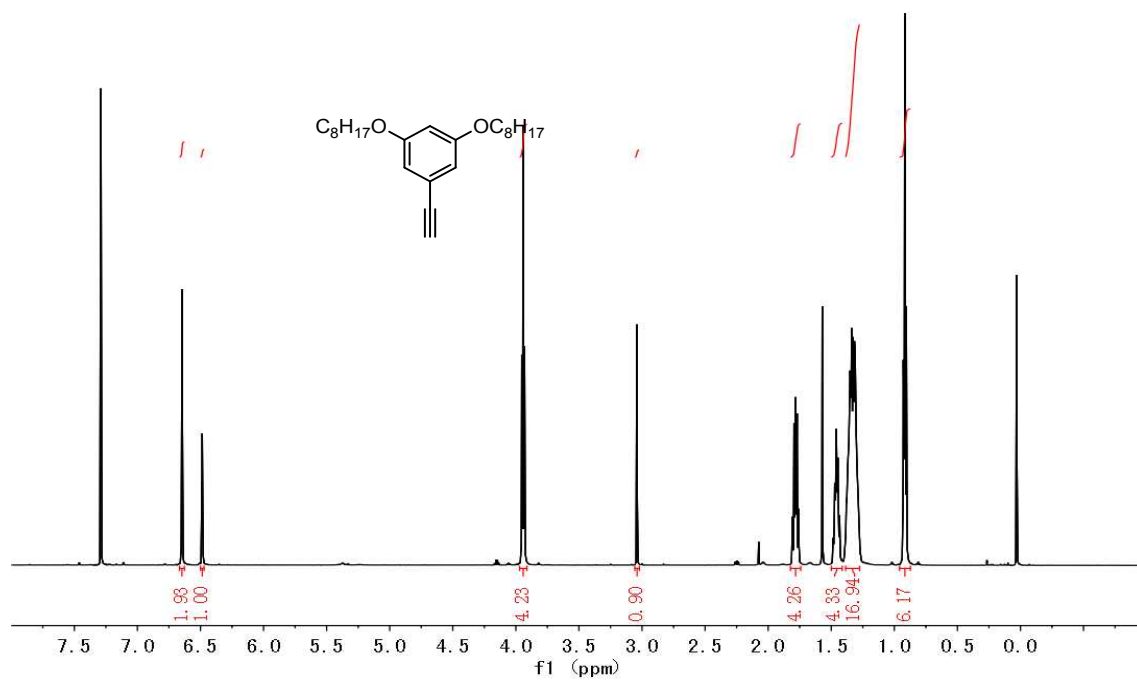

**Fig. S3** <sup>1</sup>H NMR of 1-ethynyl-3,5-bis(octyloxy)phenyl (M4)

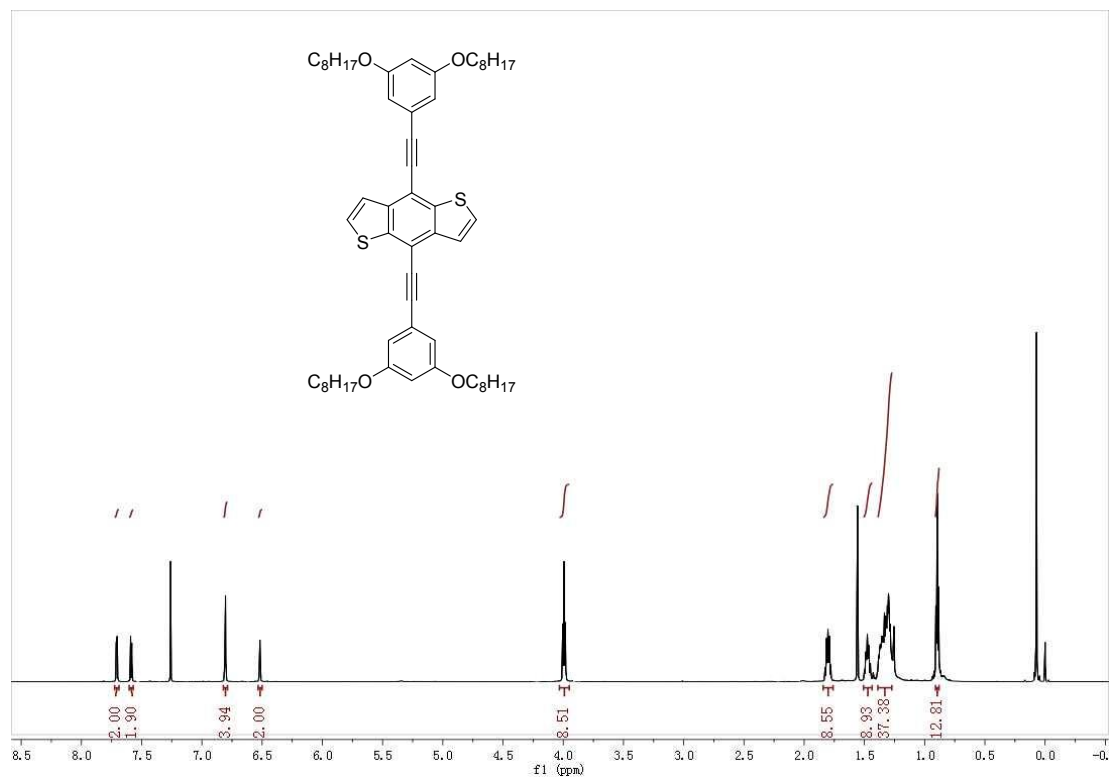

**Fig. S4** <sup>1</sup>H NMR of 4,8-bis(1-ethynyl-3,5-bis(octyloxy)phenyl)-benzo[1,2-b:4,5-b']dithiophene (M5)

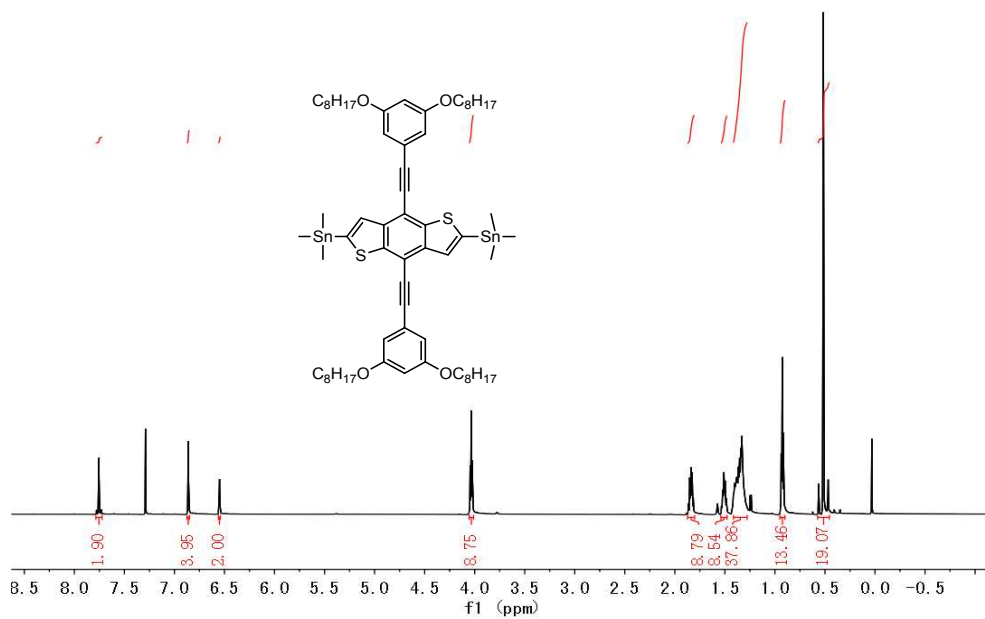

**Fig. S5** <sup>1</sup>H NMR of 2,6-bis(trimethyltin-4,8-bis(1-ethynyl-3,5-bis(octyloxy)phenyl)-benzo[1,2-b:4,5-b']dithiophene (M6)

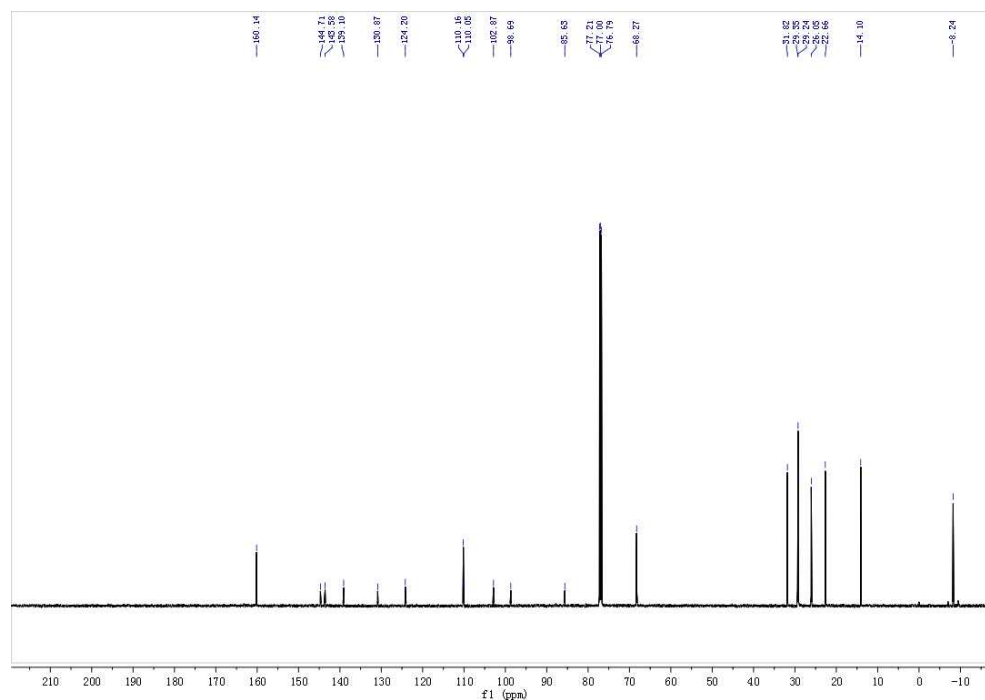

**Fig. S6** <sup>13</sup>C NMR of 2,6-bis(trimethyltin-4,8-bis(1-ethynyl-3,5-bis(octyloxy)phenyl)-benzo[1,2-b:4,5-b']dithiophene (M6)

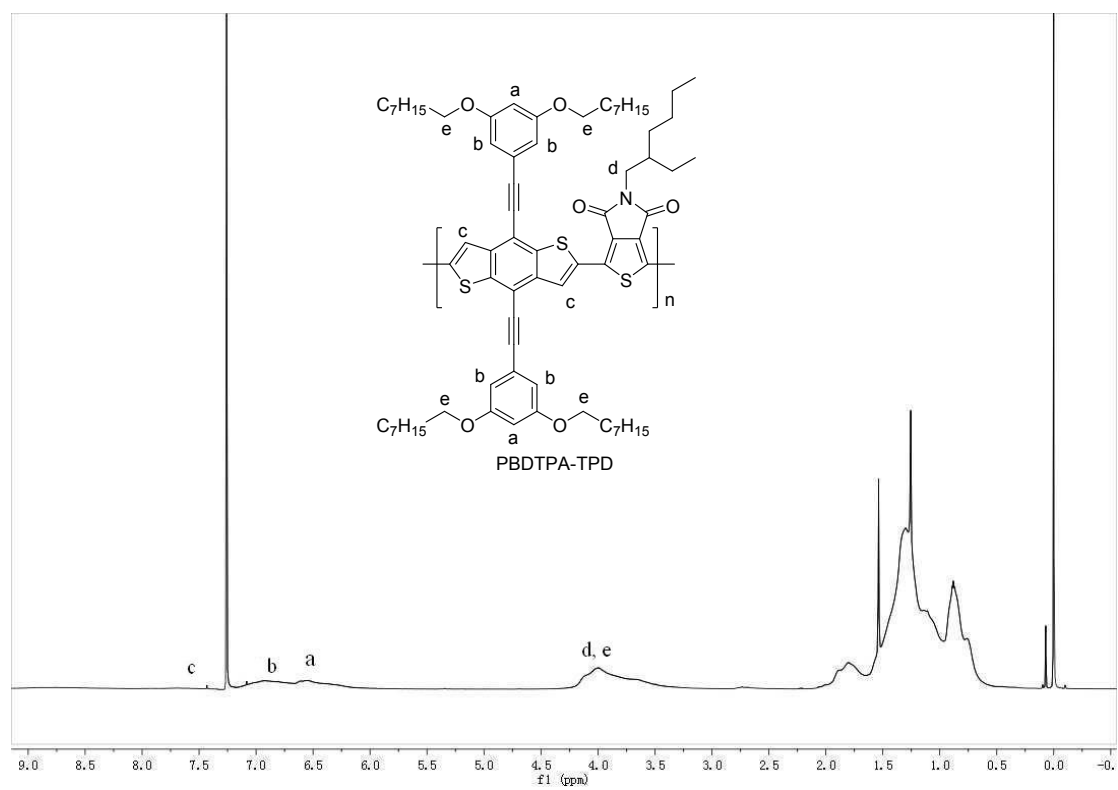

**Fig. S7**  $^1\text{H}$  NMR of PBDTPA-TPD

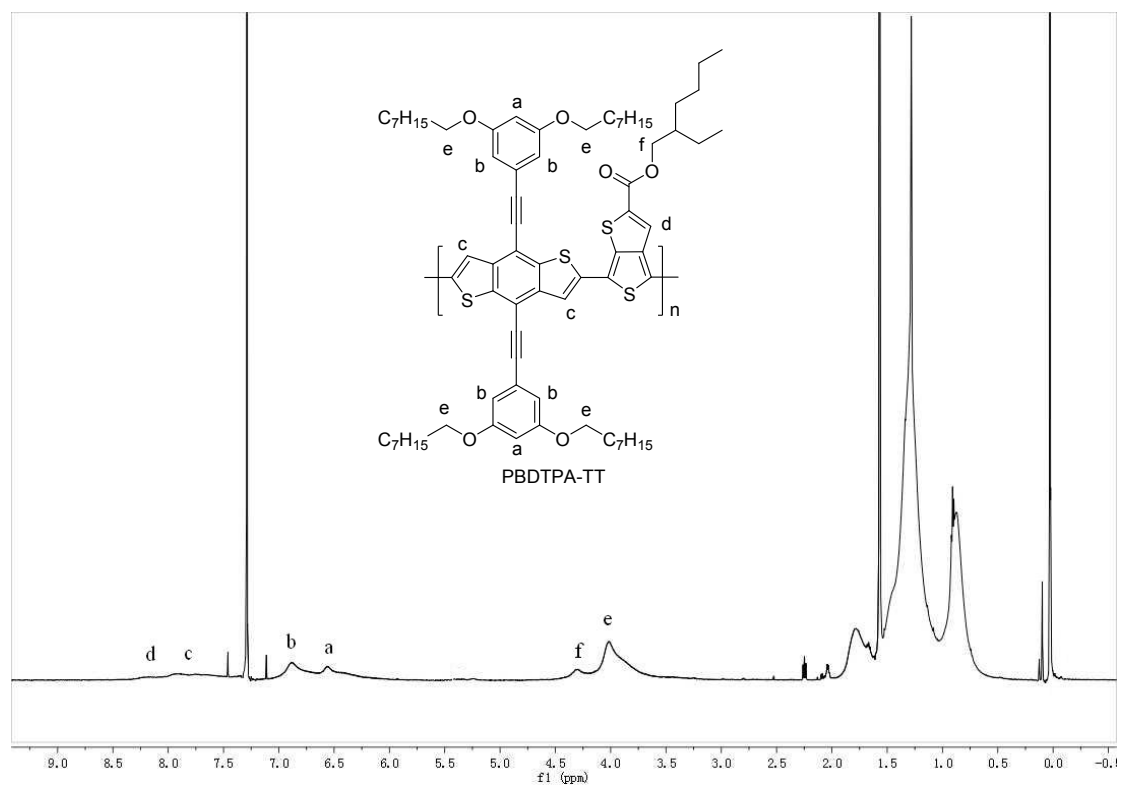

**Fig. S8**  $^1\text{H}$  NMR of PBDTPA-TT

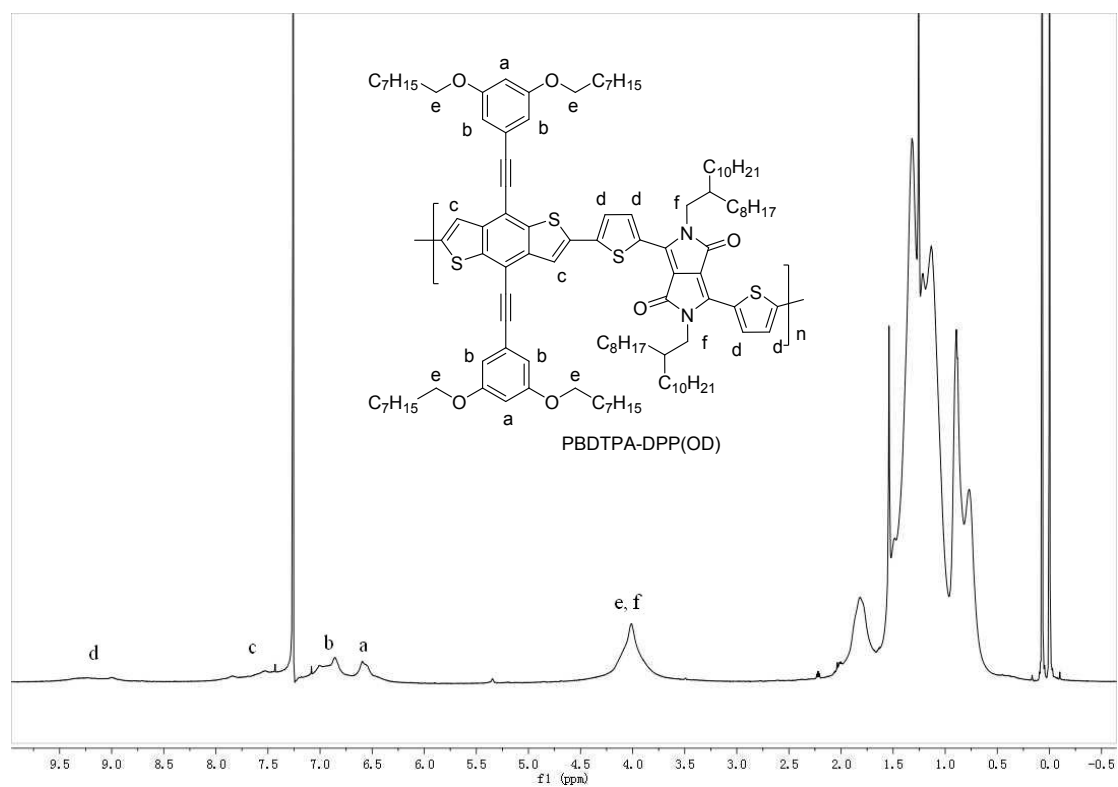

**Fig. S9** <sup>1</sup>H NMR of PBDTPA-DPP(OD)

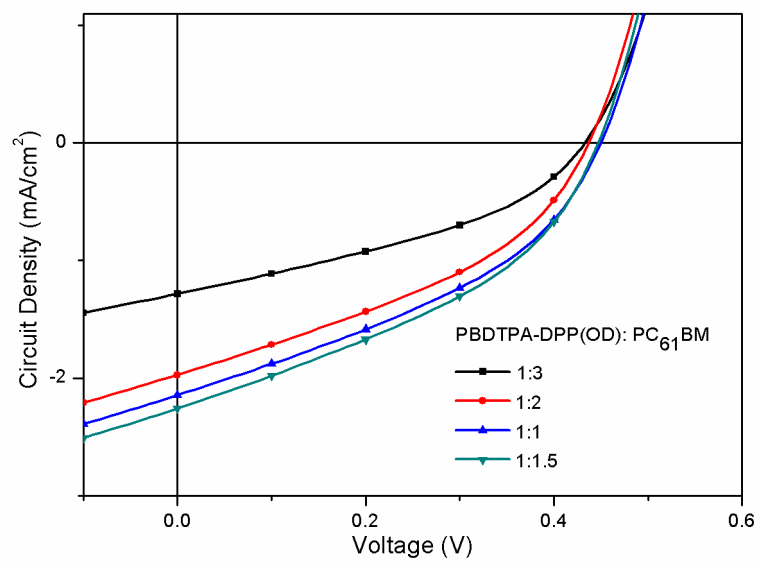

**Fig. S10** J-V curves of OSCs based on PBDTPA-DPP(OD) and PC<sub>61</sub>BM with different blend ratios (1:1, 1:1.5, 1:2 and 1:3, w/w)
